# Supplementary material for: RNA-Seq Revealed Expression of Many Novel Genes Associated With Leishmania donovani Persistence and Clearance in the Host Macrophage
Source: Front Cell Infect Microbiol. 2019 Feb 5;9:17. doi: 10.3389/fcimb.2019.00017 (PMC6370631; doi:10.3389/fcimb.2019.00017)
Supplement: Supplementary Data Sheet 3 — List of DE genes in murine macrophage infected with virulent and non-virulent L. donovani parasites. In infected macrophage compared to uninfected control, genes that were differentially expressed (DE) at a P-value < 0.01, were used as input with up- and down-regulated genes considered separately. The unique genes modulated by (A) virulent and (B) Non-virulent and (C) common downregulated, (D) common upregulated genes were listed separately. [file Data_Sheet_3.xlsx]

## Sheet: (A) vAG83
Gene Name	MGI ID	Gene Symbol	Description	baseMean C	baseMean A2nd	foldChange	log2FoldChange	pval			Gene Name	MGI ID	Gene Symbol	Description	baseMean C	baseMean A2nd	foldChange	log2FoldChange	pval
Dennd4c	MGI:1914769	Dennd4c	DENN/MADD domain containing 4C	757.938	30.901	0.0407698	-4.61636	0.00036626	down	1	Marcksl1	MGI:97143	Marcksl1	MARCKS-like 1	2144.5	14484.2	6.75412	2.75577	0.00209869	up
Eif3a	MGI:95301; MGI:1196288	Eif3a; Eif6	eukaryotic translation initiation factor 3, subunit A; eukaryotic translation initiation factor 6	1635.61	170.373	0.104165	-3.26306	0.00181659	down	2	Ccl22	MGI:1306779	Ccl22	chemokine (C-C motif) ligand 22	335.265	2219.86	6.62121	2.72709	0.00554298	up
Rab8b	MGI:2442982	Rab8b	RAB8B, member RAS oncogene family	1726.61	191.252	0.110767	-3.1744	0.00214585	down	3	Tmem132e	MGI:2685490	Tmem132e	transmembrane protein 132E	1.19737	171.208	142.986	7.15973	0.0073338	up
Abca1	MGI:99607	Abca1	ATP-binding cassette, sub-family A (ABC1), member 1	2134.92	252.219	0.11814	-3.08143	0.00215167	down
Erap1	MGI:1933403	Erap1	endoplasmic reticulum aminopeptidase 1	870.491	70.9887	0.0815502	-3.61617	0.00231933	down
Zfp445	MGI:2143340	Zfp445	zinc finger protein 445	530.437	28.3955	0.0535323	-4.22345	0.00237289	down
Dmxl2	MGI:2444630	Dmxl2	Dmx-like 2	464.581	21.7142	0.0467393	-4.41922	0.00250761	down
F13a1	MGI:1921395	F13a1	coagulation factor XIII, A1 subunit	2411.51	309.01	0.128139	-2.96421	0.0026516	down
Iqgap2	MGI:2449975	Iqgap2	IQ motif containing GTPase activating protein 2	326.883	9.18677	0.0281042	-5.15307	0.00273611	down
Lrrk2	MGI:1913975	Lrrk2	leucine-rich repeat kinase 2	397.528	15.8681	0.0399168	-4.64686	0.00285403	down
Ifi204	MGI:96428; MGI:96429; MGI:101847; MGI:2138243; MGI:2138302; MGI:2442822; MGI:3041120; MGI:3584522; MGI:3646410; MGI:3695276; MGI:3780953	Ifi203; Ifi204; Ifi205; Pyhin1; AI607873; Pydc3; Mnda; BC094916; Gm4955; Pydc4; Mndal	interferon activated gene 203; interferon activated gene 204; interferon activated gene 205; pyrin and HIN domain family, member 1; expressed sequence AI607873; pyrin domain containing 3; myeloid cell nuclear differentiation antigen; cDNA sequence BC094916; predicted gene 4955; pyrin domain containing 4; myeloid nuclear differentiation antigen like	1239.28	131.12	0.105803	-3.24054	0.00291987	down
Adam10	MGI:109548	Adam10	a disintegrin and metallopeptidase domain 10	1083.62	108.571	0.100193	-3.31915	0.00301471	down
Cpeb4	MGI:1914829	Cpeb4	cytoplasmic polyadenylation element binding protein 4	373.581	14.1977	0.0380045	-4.71769	0.00314452	down
Ifit2	MGI:99449	Ifit2	interferon-induced protein with tetratricopeptide repeats 2	1823.6	227.999	0.125027	-2.99969	0.00322052	down
Atp6v0d2	MGI:1924415	Atp6v0d2	ATPase, H+ transporting, lysosomal V0 subunit D2	386.752	15.8681	0.0410291	-4.60721	0.00330534	down
Tlr7	MGI:2176882	Tlr7	toll-like receptor 7	856.122	77.67	0.090723	-3.46239	0.00337293	down
Dock10	MGI:2146320	Dock10	dedicator of cytokinesis 10	738.78	60.9668	0.0825236	-3.59905	0.00343046	down
Sp3	MGI:1277166	Sp3	trans-acting transcription factor 3	561.568	37.5822	0.0669237	-3.90134	0.00364381	down
Macf1	MGI:108559	Macf1	microtubule-actin crosslinking factor 1	1576.94	194.593	0.123399	-3.0186	0.00364796	down
Slfn5	MGI:1329004	Slfn5	schlafen 5	3715.45	564.569	0.151952	-2.71832	0.00390861	down
Actr2	MGI:1913963	Actr2	ARP2 actin-related protein 2	3319.12	501.932	0.151224	-2.72524	0.0041096	down
Lyst	MGI:107448	Lyst	lysosomal trafficking regulator	344.844	13.3626	0.0387497	-4.68967	0.00423009	down
Vps35	MGI:1890467	Vps35	VPS35 retromer complex component	1470.38	190.417	0.129502	-2.94895	0.00476144	down
Mmp12	MGI:97005	Mmp12	matrix metallopeptidase 12	20924.1	3730.66	0.178295	-2.48766	0.00482163	down
Dock7	MGI:1914549	Dock7	dedicator of cytokinesis 7	585.516	45.9339	0.0784502	-3.67208	0.00502212	down
Samd8	MGI:1914880	Samd8	sterile alpha motif domain containing 8	901.623	96.0435	0.106523	-3.23076	0.00509023	down
Trip12	MGI:1309481	Trip12	thyroid hormone receptor interactor 12	1497.91	200.439	0.133812	-2.90172	0.00524496	down
Skil	MGI:106203	Skil	SKI-like	836.964	89.3622	0.106769	-3.22743	0.00585002	down
Vps13c	MGI:2444207	Vps13c	vacuolar protein sorting 13C	666.937	61.8019	0.0926653	-3.43183	0.00596662	down
Trappc8	MGI:2443008	Trappc8	trafficking protein particle complex 8	500.502	36.7471	0.0734204	-3.76767	0.00614164	down
Fndc3a	MGI:1196463	Fndc3a	fibronectin type III domain containing 3A	676.516	64.3074	0.0950567	-3.39507	0.00622755	down
Copb1	MGI:1917599	Copb1	coatomer protein complex, subunit beta 1	1042.91	128.615	0.123323	-3.01949	0.00644605	down
Hectd1	MGI:2384768	Hectd1	HECT domain containing 1	756.74	78.5051	0.103741	-3.26894	0.00644866	down
Pum2	MGI:1931751	Pum2	pumilio RNA-binding family member 2	835.767	92.7029	0.11092	-3.17241	0.00659182	down
Rdx	MGI:97887	Rdx	radixin	490.923	36.7471	0.074853	-3.7398	0.0067449	down
Lars2	MGI:2142973	Lars2	leucyl-tRNA synthetase, mitochondrial	12858.6	2437.84	0.189588	-2.39906	0.0068048	down
Dst	MGI:104627	Dst	dystonin	670.529	65.9777	0.0983965	-3.34525	0.00698632	down
Pls3	MGI:104807; MGI:1917560	Pls3; Plscr3	plastin 3 (T-isoform); phospholipid scramblase 3	434.647	29.2306	0.0672515	-3.89429	0.00706594	down
Slk	MGI:95602; MGI:103241	Fyn; Slk	Fyn proto-oncogene; STE20-like kinase	716.03	74.3293	0.103808	-3.26802	0.00716626	down
Arfgef1	MGI:2442988	Arfgef1	ADP-ribosylation factor guanine nucleotide-exchange factor 1(brefeldin A-inhibited)	601.082	55.1206	0.0917024	-3.4469	0.00719515	down
Mrc1	MGI:97142	Mrc1	mannose receptor, C type 1	857.32	100.219	0.116898	-3.09667	0.00741351	down
Prkcb	MGI:97596	Prkcb	protein kinase C, beta	1702.67	265.581	0.15598	-2.68057	0.00799315	down
Nin	MGI:105108	Nin	ninein	708.845	75.9997	0.107216	-3.22141	0.00800997	down
Golga4	MGI:1859646	Golga4	golgi autoantigen, golgin subfamily a, 4	607.069	58.4613	0.0963009	-3.37631	0.00803541	down
Filip1l	MGI:1925999	Filip1l	filamin A interacting protein 1-like	413.094	28.3955	0.0687385	-3.86274	0.00842517	down
Tgfbr1	MGI:98728	Tgfbr1	transforming growth factor, beta receptor I	422.673	30.901	0.0731084	-3.77382	0.00913436	down
Psme4	MGI:2143994	Psme4	proteasome (prosome, macropain) activator subunit 4	694.477	78.5051	0.113042	-3.14507	0.00965461	down
Eif2ak2	MGI:1353449	Eif2ak2	eukaryotic translation initiation factor 2-alpha kinase 2	642.99	69.3184	0.107806	-3.21349	0.00974364	down
Cav2	MGI:107571	Cav2	caveolin 2	387.949	26.7252	0.0688883	-3.8596	0.00988092	down
B230219D22Rik	MGI:1925771	B230219D22Rik	RIKEN cDNA B230219D22 gene	415.489	30.901	0.0743726	-3.74909	0.00988354	down
Stxbp3	MGI:107362	Stxbp3	syntaxin binding protein 3	844.149	107.736	0.127627	-2.97	0.00992343	down

## Sheet: (B) nvAG83
Gene Name	MGI ID	Gene Symbol	Description	baseMean C	baseMean A25	foldChange	log2FoldChange	pval			Gene Name	MGI ID	Gene Symbol	Description	baseMean C	baseMean A25	foldChange	log2FoldChange	pval
Ctsk	MGI:107823	Ctsk	cathepsin K	2232.86	201.478	0.0902334	-3.4702	1.95378e-05	down	1	Marco	MGI:1309998	Marco	macrophage receptor with collagenous structure	177.25	4611.25	26.0155	4.7013	8.07709e-09	up
Chil3	MGI:1330860; MGI:1341098	Chil3; Chil4	chitinase-like 3; chitinase-like 4	908.406	55.244	0.0608142	-4.03945	2.48862e-05	down	2	Ccl7	MGI:99512	Ccl7	chemokine (C-C motif) ligand 7	163.71	2897.06	17.6963	4.14538	4.37167e-07	up
Map6	MGI:1201690	Map6	microtubule-associated protein 6	664.687	39.8082	0.0598901	-4.06154	7.87902e-05	down	3	Cpa3	MGI:88479; MGI:1919041; MGI:1923953	Cpa3; Cpa4; Cpb1	carboxypeptidase A3, mast cell; carboxypeptidase A4; carboxypeptidase B1 (tissue)	0	261.597	Inf	Inf	8.08038e-06	up
Slco4a1	MGI:1351866	Slco4a1	solute carrier organic anion transporter family, member 4a1	1212.44	110.488	0.0911288	-3.45595	8.58909e-05	down	4	Cxcl9	MGI:1352449	Cxcl9	chemokine (C-X-C motif) ligand 9	18.4635	516.694	27.9846	4.80656	3.57915e-05	up
Cyp1b1	MGI:88590	Cyp1b1	cytochrome P450, family 1, subfamily b, polypeptide 1	275.722	4.87447	0.0176789	-5.82183	0.0001238	down	5	Ccl2	MGI:98259; MGI:108224	Ccl2; Ccl12	chemokine (C-C motif) ligand 2; chemokine (C-C motif) ligand 12	773.007	6456.24	8.35211	3.06214	3.6451e-05	up
Cd93	MGI:106664	Cd93	CD93 antigen	1122.58	113.738	0.101318	-3.30304	0.000186567	down	6	Jam2	MGI:1933820	Jam2	junction adhesion molecule 2	8.61632	389.145	45.1638	5.49709	3.81075e-05	up
Rhov	MGI:2444227	Rhov	ras homolog family member V	574.831	42.2454	0.0734919	-3.76627	0.000328138	down	7	Dab2	MGI:109175	Dab2	disabled 2, mitogen-responsive phosphoprotein	139.092	1571.21	11.2962	3.49776	3.83859e-05	up
Dio2	MGI:1338833	Dio2	deiodinase, iodothyronine, type II	152.632	0	0	-Inf	0.000246166	down	8	Cyp11a1	MGI:88582	Cyp11a1	cytochrome P450, family 11, subfamily a, polypeptide 1	0	212.852	Inf	Inf	4.88957e-05	up
Glipr1	MGI:1920940	Glipr1	GLI pathogenesis-related 1 (glioma)	3194.19	560.564	0.175495	-2.5105	0.000858988	down	9	Fam26f	MGI:2443082	Fam26f	family with sequence similarity 26, member F	150.17	1606.14	10.6955	3.41893	5.04785e-05	up
Krr1	MGI:1289274; MGI:96698	Krr1; Krt1	KRR1, small subunit (SSU) processome component, homolog (yeast); keratin 1	1696.18	248.598	0.146563	-2.77041	0.000620888	down	10	Dmwd	MGI:94907; MGI:1927643	Dmwd; Rsph6a	dystrophia myotonica-containing WD repeat motif; radial spoke head 6 homolog A (Chlamydomonas)	32.0035	601.185	18.785	4.23151	8.10432e-05	up
Lox	MGI:96817	Lox	lysyl oxidase	140.323	0.812412	0.00578959	-7.43232	0.00127744	down	11	Csf1	MGI:1339753	Csf1	colony stimulating factor 1 (macrophage)	65.2378	879.03	13.4742	3.75213	8.19119e-05	up
Aph1c	MGI:1915568	Aph1c	aph1 homolog C, gamma secretase subunit	789.008	110.488	0.140034	-2.83615	0.00206537	down	12	Ccl6	MGI:98263	Ccl6	chemokine (C-C motif) ligand 6	6147.13	38495.3	6.26233	2.6467	0.000173423	up
Lhfpl2	MGI:2145236	Lhfpl2	lipoma HMGIC fusion partner-like 2	2898.78	583.312	0.201227	-2.3131	0.00210097	down	13	Blk	MGI:88169; MGI:1206591	Blk; Bik	B lymphoid kinase; BCL2-interacting killer	9.84722	331.464	33.6607	5.07299	0.000210296	up
Slc6a12	MGI:95628	Slc6a12	solute carrier family 6 (neurotransmitter transporter, betaine/GABA), member 12	2390.41	472.011	0.19746	-2.34037	0.00221936	down	14	Il2rb	MGI:96550	Il2rb	interleukin 2 receptor, beta chain	2.4618	229.1	93.0619	6.54012	0.000227139	up
Spp1	MGI:98389; MGI:1921572; MGI:2135760	Spp1; Cxxc1; Sgpp1	secreted phosphoprotein 1; CXXC finger 1 (PHD domain); sphingosine-1-phosphate phosphatase 1	1427.85	263.222	0.184349	-2.43949	0.00272649	down	15	Sema7a	MGI:1306826	Sema7a	sema domain, immunoglobulin domain (Ig), and GPI membrane anchor, (semaphorin) 7A	35.6962	553.253	15.4989	3.9541	0.000246114	up
Ptgr1	MGI:1914353	Ptgr1	prostaglandin reductase 1	9889.07	2315.37	0.234135	-2.09459	0.00298176	down	16	Adora2b	MGI:99403	Adora2b	adenosine A2b receptor	151.401	1304.73	8.61774	3.10731	0.000277814	up
Fabp5	MGI:101790	Fabp5	fatty acid binding protein 5, epidermal	12870.3	3074.17	0.238857	-2.06578	0.0031977	down	17	Egr1	MGI:95295	Egr1	early growth response 1	23.3871	441.952	18.8972	4.2401	0.000301984	up
Chd5	MGI:1918639; MGI:2136882; MGI:2685385; MGI:3036258	Chd6; Wrb; Kalrn; Chd5	chromodomain helicase DNA binding protein 6; tryptophan rich basic protein; kalirin, RhoGEF kinase; chromodomain helicase DNA binding protein 5	145.246	2.43724	0.01678	-5.89711	0.00324794	down	18	F3	MGI:105980; MGI:88381; MGI:1333750	Cntn1; F3; Olfr54	contactin 1; coagulation factor III; olfactory receptor 54	36.9271	533.755	14.4543	3.85343	0.000369617	up
Vwf	MGI:98941	Vwf	Von Willebrand factor	262.182	17.0607	0.0650717	-3.94182	0.00376687	down	19	Kit	MGI:96677	Kit	kit oncogene	1.2309	191.729	155.763	7.28321	0.000375934	up
Slc7a11	MGI:1347355	Slc7a11	solute carrier family 7 (cationic amino acid transporter, y+ system), member 11	1467.24	298.968	0.203763	-2.29504	0.00436505	down	20	Lcn2	MGI:96757	Lcn2	lipocalin 2	561.291	3574.61	6.36855	2.67097	0.000382751	up
Cd9	MGI:88348; MGI:2179989	Cd9; Mill2	CD9 antigen; MHC I like leukocyte 2	4677.43	1124.38	0.240384	-2.05659	0.00444201	down	21	Fcna	MGI:1340905	Fcna	ficolin A	851.784	5045.08	5.92295	2.56632	0.000472911	up
Cadm1	MGI:1889272	Cadm1	cell adhesion molecule 1	1209.98	235.6	0.194714	-2.36057	0.0044622	down	22	Timp1	MGI:98752	Timp1	tissue inhibitor of metalloproteinase 1	358.193	2313.75	6.45951	2.69143	0.000555424	up
Tbc1d23	MGI:1914831	Tbc1d23	TBC1 domain family, member 23	638.838	101.552	0.158963	-2.65324	0.00543175	down	23	Cd81	MGI:1096398	Cd81	CD81 antigen	187.097	1373.79	7.34265	2.8763	0.000595607	up
Gstm1	MGI:95860; MGI:95861	Gstm1; Gstm2	glutathione S-transferase, mu 1; glutathione S-transferase, mu 2	3877.34	960.271	0.247662	-2.01355	0.00572937	down	24	Cish	MGI:103159	Cish	cytokine inducible SH2-containing protein	17.2326	354.212	20.5547	4.3614	0.000603001	up
Lyst	MGI:107448	Lyst	lysosomal trafficking regulator	208.023	12.9986	0.0624865	-4.00031	0.00744793	down	25	Naaa	MGI:1914361	Naaa	N-acylethanolamine acid amidase	337.267	2125.27	6.30144	2.65568	0.000715068	up
Cdkn1c	MGI:104564	Cdkn1c	cyclin-dependent kinase inhibitor 1C (P57)	184.635	9.74895	0.0528011	-4.24329	0.00789483	down	26	Gimap6	MGI:1918876	Gimap6	GTPase, IMAP family member 6	6.15451	242.099	39.3368	5.29781	0.000734421	up
Alcam	MGI:1313266	Alcam	activated leukocyte cell adhesion molecule	1790.96	434.64	0.242685	-2.04284	0.00852204	down	27	Fn1	MGI:95566	Fn1	fibronectin 1	550.213	3202.53	5.82052	2.54115	0.000744404	up
Galnt7	MGI:1349449; MGI:1926004	Galnt7; Galnt15	UDP-N-acetyl-alpha-D-galactosamine: polypeptide N-acetylgalactosaminyltransferase 7; UDP-N-acetyl-alpha-D-galactosamine:polypeptide N-acetylgalactosaminyltransferase 15	407.429	56.0564	0.137586	-2.8616	0.00870297	down	28	Card11	MGI:1916978	Card11	caspase recruitment domain family, member 11	2.4618	193.354	78.5416	6.29539	0.000767262	up
Gstm2	MGI:95862; MGI:95861; MGI:1915562	Gstm4; Gstm2; Gstm7	glutathione S-transferase, mu 4; glutathione S-transferase, mu 2; glutathione S-transferase, mu 7	180.943	9.74895	0.0538786	-4.21414	0.00876425	down	29	Hbegf	MGI:96070	Hbegf	heparin-binding EGF-like growth factor	50.467	557.315	11.0432	3.46508	0.00089281	up
Bnip3l	MGI:1332659	Bnip3l	BCL2/adenovirus E1B interacting protein 3-like	1169.36	263.222	0.225099	-2.15137	0.00914332	down	30	Lck	MGI:96756	Lck	lymphocyte protein tyrosine kinase	6.15451	231.537	37.6208	5.23346	0.000996384	up
Ppp1cb	MGI:104871	Ppp1cb	protein phosphatase 1, catalytic subunit, beta isoform	615.451	112.113	0.182164	-2.45669	0.00979608	down	31	Cd163	MGI:2135946; MGI:2443796	Cd163; Cd163l1	CD163 antigen; CD163 molecule-like 1	9.84722	268.096	27.2256	4.76689	0.000996849	up
										32	Gzmb	MGI:109265; MGI:109267	Gzme; Gzmb	granzyme E; granzyme B	6.15451	227.475	36.9608	5.20792	0.00112153	up
										33	Pecam1	MGI:97537	Pecam1	platelet/endothelial cell adhesion molecule 1	0	130.798	Inf	Inf	0.0014971	up
										34	Serpinb1a	MGI:1913472	Serpinb1a	serine (or cysteine) peptidase inhibitor, clade B, member 1a	8.61632	236.412	27.4377	4.77809	0.00170608	up
										35	Tnfsf14	MGI:1355317	Tnfsf14	tumor necrosis factor (ligand) superfamily, member 14	9.84722	246.973	25.0805	4.64849	0.00171373	up
										36	Thy1	MGI:98747	Thy1	thymus cell antigen 1, theta	6.15451	212.852	34.5847	5.11206	0.00172486	up
										37	Ikzf3	MGI:1342542	Ikzf3	IKAROS family zinc finger 3	11.0781	256.722	23.1738	4.53442	0.00173711	up
										38	C1qc	MGI:88225	C1qc	complement component 1, q subcomponent, C chain	1531.24	7205.28	4.70551	2.23435	0.00175995	up
										39	Atp2a3	MGI:1194503	Atp2a3	ATPase, Ca++ transporting, ubiquitous	102.165	737.67	7.22039	2.85208	0.00234055	up
										40	Hip1r	MGI:1352504	Hip1r	huntingtin interacting protein 1 related	11.0781	244.536	22.0738	4.46426	0.00235912	up
										41	Plau	MGI:97611	Plau	plasminogen activator, urokinase	1334.3	6042.72	4.52876	2.17912	0.00238532	up
										42	Plxdc2	MGI:1914698	Plxdc2	plexin domain containing 2	4.92361	189.292	38.4458	5.26475	0.00242528	up
										43	Nlrp3	MGI:2653833	Nlrp3	NLR family, pyrin domain containing 3	435.739	2195.14	5.03773	2.33277	0.002466	up
										44	Tspan32	MGI:1350360	Tspan32	tetraspanin 32	3.69271	174.669	47.301	5.5638	0.00253997	up
										45	Sept1	MGI:1858916	Sept1	septin 1	16.0017	272.158	17.008	4.08814	0.00285912	up
										46	C1qb	MGI:88224	C1qb	complement component 1, q subcomponent, beta polypeptide	1153.36	5101.14	4.42286	2.14498	0.00295454	up
										47	Acap1	MGI:2388270	Acap1	ArfGAP with coiled-coil, ankyrin repeat and PH domains 1	36.9271	391.583	10.6042	3.40657	0.00310114	up
										48	Il2ra	MGI:96549	Il2ra	interleukin 2 receptor, alpha chain	0	112.113	Inf	Inf	0.00353471	up
										49	Trp53i11	MGI:2670995	Trp53i11	transformation related protein 53 inducible protein 11	1.2309	134.048	108.902	6.76689	0.00356565	up
										50	Gpr84	MGI:1934129	Gpr84	G protein-coupled receptor 84	814.857	3586.8	4.40175	2.13808	0.00363423	up
										51	Itgal	MGI:96606	Itgal	integrin alpha L	1133.66	4840.35	4.26966	2.09412	0.00372649	up
										52	Gata2	MGI:95662	Gata2	GATA binding protein 2	16.0017	255.91	15.9926	3.99934	0.00412234	up
										53	Siglec1	MGI:99668	Siglec1	sialic acid binding Ig-like lectin 1, sialoadhesin	1377.38	5711.26	4.14647	2.05188	0.00414261	up
										54	Ets1	MGI:95455	Ets1	E26 avian leukemia oncogene 1, 5' domain	8.61632	202.291	23.4776	4.55321	0.0043543	up
										55	Rhobtb1	MGI:1916538	Rhobtb1	Rho-related BTB domain containing 1	9.84722	210.415	21.3679	4.41738	0.0044952	up
										56	Pax5	MGI:97489	Pax5	paired box 5	0	106.426	Inf	Inf	0.00462113	up
										57	Ltb	MGI:104796	Ltb	lymphotoxin B	35.6962	359.086	10.0595	3.33049	0.00470539	up
										58	Gimap4	MGI:1349656	Gimap4	GTPase, IMAP family member 4	4.92361	168.169	34.1557	5.09405	0.00478179	up
										59	Gimap1	MGI:109368; MGI:1932723; MGI:2442232	Gimap1; Gimap3; Gimap5	GTPase, IMAP family member 1; GTPase, IMAP family member 3; GTPase, IMAP family member 5	14.7708	241.286	16.3353	4.02992	0.00481671	up
										60	C4a	MGI:88228; MGI:98320	C4b; C4a	complement component 4B (Chido blood group); complement component 4A (Rodgers blood group)	110.781	692.175	6.24813	2.64342	0.0048575	up
										61	Edn1	MGI:95283	Edn1	endothelin 1	54.1597	445.202	8.22017	3.03917	0.0049009	up
										62	Fcrla	MGI:2138647	Fcrla	Fc receptor-like A	9.84722	206.353	20.9554	4.38925	0.0050136	up
										63	Ccl3	MGI:98260	Ccl3	chemokine (C-C motif) ligand 3	1040.11	4257.04	4.09286	2.03311	0.00504242	up
										64	Fcer1a	MGI:95494	Fcer1a	Fc receptor, IgE, high affinity I, alpha polypeptide	1.2309	124.299	100.982	6.65796	0.00532374	up
										65	Amica1	MGI:2685484	Amica1	adhesion molecule, interacts with CXADR antigen 1	20.9253	272.158	13.0061	3.70112	0.00549464	up
										66	Ctsc	MGI:109553	Ctsc	cathepsin C	2325.17	8977.15	3.86085	1.94892	0.00554069	up
										67	Cfp	MGI:97545	Cfp	complement factor properdin	5225.18	19704.2	3.77102	1.91495	0.00564198	up
										68	Slfn1	MGI:1313259	Slfn1	schlafen 1	760.698	3135.1	4.12135	2.04312	0.00569051	up
										69	C1qa	MGI:88223	C1qa	complement component 1, q subcomponent, alpha polypeptide	4332.78	16167	3.73133	1.89969	0.00614694	up
										70	Dbp	MGI:94866; MGI:95669; MGI:105089; MGI:106181	Dbp; Gc; Hsd17b4; Mybbp1a	D site albumin promoter binding protein; group specific component; hydroxysteroid (17-beta) dehydrogenase 4; MYB binding protein (P160) 1a	56.6215	436.265	7.70494	2.94578	0.00637315	up
										71	Hdc	MGI:96062; MGI:2685715	Hdc; Heca	histidine decarboxylase; hdc homolog, cell cycle regulator	7.38541	178.731	24.2005	4.59696	0.00652725	up
										72	Ly6a	MGI:96882; MGI:107527; MGI:109440; MGI:109441; MGI:1888480; MGI:3712069	Ly6c1; Ly6a; Ly6g; Ly6f; Ly6i; Ly6c2	lymphocyte antigen 6 complex, locus C1; lymphocyte antigen 6 complex, locus A; lymphocyte antigen 6 complex, locus G; lymphocyte antigen 6 complex, locus F; lymphocyte antigen 6 complex, locus I; lymphocyte antigen 6 complex, locus C2	840.706	3321.95	3.95138	1.98236	0.00693644	up
										73	Nup210	MGI:1859555	Nup210	nucleoporin 210	19.6944	253.473	12.8703	3.68597	0.00703979	up
										74	Wnt1	MGI:98953	Wnt1	wingless-type MMTV integration site family, member 1	0	97.4895	Inf	Inf	0.0070862	up
										75	Lfng	MGI:1095413	Lfng	LFNG O-fucosylpeptide 3-beta-N-acetylglucosaminyltransferase	355.731	1560.64	4.38715	2.13328	0.00711537	up
										76	Cxcr5	MGI:103567	Cxcr5	chemokine (C-X-C motif) receptor 5	16.0017	230.725	14.4188	3.84987	0.0073356	up
										77	Rnase6	MGI:1925666	Rnase6	ribonuclease, RNase A family, 6	1.2309	115.363	93.7219	6.55031	0.00772792	up
										78	Osm	MGI:104749; MGI:2384924	Osm; Ccm2	oncostatin M; cerebral cavernous malformation 2	75.085	497.196	6.62177	2.72722	0.00780953	up
										79	Abtb2	MGI:2139365	Abtb2	ankyrin repeat and BTB (POZ) domain containing 2	104.627	610.121	5.83141	2.54385	0.00810852	up
										80	Trf	MGI:96557; MGI:98821; MGI:98823; MGI:109634	Il5; Trf; Trh; Terf1	interleukin 5; transferrin; thyrotropin releasing hormone; telomeric repeat binding factor 1	871.479	3316.27	3.80533	1.92802	0.0085096	up
										81	C4b	MGI:88228; MGI:98320	C4b; C4a	complement component 4B (Chido blood group); complement component 4A (Rodgers blood group)	4450.94	15539	3.49117	1.80371	0.00912289	up
										82	Fzd1	MGI:1196625	Fzd1	frizzled class receptor 1	157.556	792.914	5.0326	2.3313	0.00914698	up
										83	Cdkn1a	MGI:104556	Cdkn1a	cyclin-dependent kinase inhibitor 1A (P21)	1361.38	4911.84	3.60799	1.8512	0.00964159	up
										84	Ms4a8a	MGI:1927657	Ms4a8a	membrane-spanning 4-domains, subfamily A, member 8A	515.748	2028.59	3.9333	1.97574	0.00972135	up
										85	Socs1	MGI:1354910	Socs1	suppressor of cytokine signaling 1	252.335	1117.07	4.42692	2.1463	0.00985999	up

## Sheet: (C) Common down
Gene Name	MGI ID	Gene Symbol	Description	baseMean C	baseMean A2nd	foldChange	log2FoldChange	pval		Gene Name	MGI ID	Gene Symbol	Description	baseMean C	baseMean A25	foldChange	log2FoldChange	pval
Cd36	MGI:107899	Cd36	CD36 antigen	5669.57	403.383	0.0711488	-3.81302	8.02079e-05		Cd36	MGI:107899	Cd36	CD36 antigen	2820	392.395	0.139147	-2.84532	0.000227802
Tfrc	MGI:98822	Tfrc	transferrin receptor	2106.18	126.109	0.0598758	-4.06188	0.000120085		Tfrc	MGI:98822	Tfrc	transferrin receptor	1061.04	122.674	0.115617	-3.11257	0.000425933
Myo5a	MGI:105976	Myo5a	myosin VA	1924.18	111.076	0.0577266	-4.11462	0.000120955		Myo5a	MGI:105976	Myo5a	myosin VA	969.951	108.051	0.111398	-3.1662	0.000438322
Gpnmb	MGI:1934765	Gpnmb	glycoprotein (transmembrane) nmb	40746.6	3631.28	0.0891185	-3.48813	0.000133461		Gpnmb	MGI:1934765	Gpnmb	glycoprotein (transmembrane) nmb	57435.1	3532.37	0.0615019	-4.02323	6.94958e-08
Tlr13	MGI:3045213	Tlr13	toll-like receptor 13	1805.64	107.736	0.0596663	-4.06694	0.000157686		Tlr13	MGI:3045213	Tlr13	toll-like receptor 13	1081.96	104.801	0.096862	-3.36792	0.000161775
Il7r	MGI:96562	Il7r	interleukin 7 receptor	852.53	34.2416	0.0401647	-4.63793	0.000239779		Il7r	MGI:96562	Il7r	interleukin 7 receptor	589.602	33.3089	0.0564938	-4.14576	0.000100295
Tax1bp1	MGI:1289308	Tax1bp1	Tax1 (human T cell leukemia virus type I) binding protein 1	1762.53	115.252	0.0653901	-3.93478	0.000243257		Tax1bp1	MGI:1289308	Tax1bp1	Tax1 (human T cell leukemia virus type I) binding protein 1	764.39	112.113	0.14667	-2.76936	0.00270174
Met	MGI:96969; MGI:1913910; MGI:1915147	Met; Sltm; Rnmt	met proto-oncogene; SAFB-like, transcription modulator; RNA (guanine-7-) methyltransferase	674.121	21.7142	0.0322111	-4.9563	0.00026665		Met	MGI:96969; MGI:1913910; MGI:1915147	Met; Sltm; Rnmt	met proto-oncogene; SAFB-like, transcription modulator; RNA (guanine-7-) methyltransferase	729.925	21.1227	0.0289382	-5.11088	1.79676e-06
Ahnak	MGI:1316648	Ahnak	AHNAK nucleoprotein (desmoyokin)	8890.5	878.589	0.0988234	-3.339	0.000329956		Ahnak	MGI:1316648	Ahnak	AHNAK nucleoprotein (desmoyokin)	5539.06	854.658	0.154296	-2.69622	0.000248591
Mmp8	MGI:97010; MGI:1202395	Mmp3; Mmp8	matrix metallopeptidase 3; matrix metallopeptidase 8	996.215	50.9448	0.0511384	-4.28945	0.000346593		Mmp8	MGI:97010; MGI:1202395	Mmp3; Mmp8	matrix metallopeptidase 3; matrix metallopeptidase 8	641.3	49.5571	0.077276	-3.69383	0.000274735
Sgk1	MGI:1340062	Sgk1	serum/glucocorticoid regulated kinase 1	4869.72	525.316	0.107874	-3.21258	0.000700638		Sgk1	MGI:1340062	Sgk1	serum/glucocorticoid regulated kinase 1	3668.09	511.007	0.139312	-2.84361	0.000173197
Cd84	MGI:1336885	Cd84	CD84 antigen	3224.53	329.053	0.102047	-3.29269	0.000750791		Cd84	MGI:1336885	Cd84	CD84 antigen	1899.28	320.09	0.168532	-2.5689	0.00116523
Anxa1	MGI:96819	Anxa1	annexin A1	4995.44	560.393	0.112181	-3.1561	0.000829731		Anxa1	MGI:96819	Anxa1	annexin A1	3785.02	545.129	0.144022	-2.79563	0.000209624
Sf3b1	MGI:1932339; MGI:2441856	Sf3b1; Sf3b2	splicing factor 3b, subunit 1; splicing factor 3b, subunit 2	1493.13	126.109	0.08446	-3.56559	0.000924174		Sf3b1	MGI:1932339; MGI:2441856	Sf3b1; Sf3b2	splicing factor 3b, subunit 1; splicing factor 3b, subunit 2	742.234	122.674	0.165277	-2.59704	0.00474077
Ogt	MGI:1339639	Ogt	O-linked N-acetylglucosamine (GlcNAc) transferase (UDP-N-acetylglucosamine:polypeptide-N-acetylglucosaminyl transferase)	1153.07	91.0326	0.0789479	-3.66296	0.00115982		Ogt	MGI:1339639	Ogt	O-linked N-acetylglucosamine (GlcNAc) transferase (UDP-N-acetylglucosamine:polypeptide-N-acetylglucosaminyl transferase)	584.679	88.5529	0.151456	-2.72303	0.0054198
Cltc	MGI:2388633	Cltc	clathrin, heavy polypeptide (Hc)	3735.81	446.811	0.119602	-3.06368	0.00135976		Cltc	MGI:2388633	Cltc	clathrin, heavy polypeptide (Hc)	1957.13	434.64	0.22208	-2.17085	0.00502797
Syngr1	MGI:1328323	Syngr1	synaptogyrin 1	584.318	31.7361	0.0543131	-4.20256	0.00186961		Syngr1	MGI:1328323	Syngr1	synaptogyrin 1	967.489	30.8717	0.031909	-4.96989	6.28473e-07
Ptprc	MGI:97810	Ptprc	protein tyrosine phosphatase, receptor type, C	2045.11	231.34	0.113118	-3.1441	0.00189244		Ptprc	MGI:97810	Ptprc	protein tyrosine phosphatase, receptor type, C	1088.12	225.038	0.206814	-2.27359	0.00681177
Rnf128	MGI:1914139	Rnf128	ring finger protein 128	2236.69	262.241	0.117245	-3.09241	0.00198255		Rnf128	MGI:1914139	Rnf128	ring finger protein 128	1905.44	255.097	0.133879	-2.901	0.000306892
Ly75	MGI:106662	Ly75	lymphocyte antigen 75	446.62	18.3735	0.0411391	-4.60335	0.00209835		Ly75	MGI:106662	Ly75	lymphocyte antigen 75	398.812	17.8731	0.0448157	-4.47985	0.000237543
Arl5a	MGI:1922673	Arl5a	ADP-ribosylation factor-like 5A	1456.01	151.999	0.104395	-3.25988	0.00216905		Arl5a	MGI:1922673	Arl5a	ADP-ribosylation factor-like 5A	915.791	147.859	0.161455	-2.6308	0.00289772
Ddx3x	MGI:103064	Ddx3x	DEAD/H (Asp-Glu-Ala-Asp/His) box polypeptide 3, X-linked	1482.35	156.175	0.105357	-3.24665	0.00218665		Ddx3x	MGI:103064	Ddx3x	DEAD/H (Asp-Glu-Ala-Asp/His) box polypeptide 3, X-linked	781.623	151.921	0.194366	-2.36315	0.00844004
Hsp90aa1	MGI:96250	Hsp90aa1	heat shock protein 90, alpha (cytosolic), class A member 1	3049.71	394.196	0.129257	-2.95169	0.00223909		Hsp90aa1	MGI:96250	Hsp90aa1	heat shock protein 90, alpha (cytosolic), class A member 1	2288.25	383.459	0.167577	-2.5771	0.000903789
Smg1	MGI:1919742	Smg1	SMG1 homolog, phosphatidylinositol 3-kinase-related kinase (C. elegans)	706.451	50.1097	0.0709316	-3.81743	0.00242361		Smg1	MGI:1919742	Smg1	SMG1 homolog, phosphatidylinositol 3-kinase-related kinase (C. elegans)	388.965	48.7447	0.125319	-2.99632	0.00726853
Atp2b1	MGI:104653	Atp2b1	ATPase, Ca++ transporting, plasma membrane 1	1391.35	151.164	0.108646	-3.2023	0.00269295		Atp2b1	MGI:104653	Atp2b1	ATPase, Ca++ transporting, plasma membrane 1	828.397	147.047	0.177507	-2.49405	0.00525234
Cav1	MGI:102709	Cav1	caveolin 1, caveolae protein	207.146	1.67032	0.00806351	-6.95438	0.0029022		Cav1	MGI:102709	Cav1	caveolin 1, caveolae protein	241.257	1.62482	0.00673483	-7.21414	4.77648e-05
Myof	MGI:1919192	Myof	myoferlin	9640.06	1500.78	0.155682	-2.68332	0.00294398		Myof	MGI:1919192	Myof	myoferlin	5547.68	1459.9	0.263156	-1.92601	0.00698645
Acpp	MGI:1928480	Acpp	acid phosphatase, prostate	440.634	20.879	0.0473841	-4.39945	0.00304106		Acpp	MGI:1928480	Acpp	acid phosphatase, prostate	296.647	20.3103	0.0684661	-3.86847	0.00280223
Hsp90b1	MGI:98817	Hsp90b1	heat shock protein 90, beta (Grp94), member 1	6477.79	988.831	0.152649	-2.71171	0.00305095		Hsp90b1	MGI:98817	Hsp90b1	heat shock protein 90, beta (Grp94), member 1	3924.12	961.896	0.245124	-2.02842	0.00537709
Colec12	MGI:2152907	Colec12	collectin sub-family member 12	1386.56	156.175	0.112635	-3.15027	0.00309082		Colec12	MGI:2152907	Colec12	collectin sub-family member 12	777.93	151.921	0.195289	-2.35632	0.00866894
Eif5b	MGI:2441772	Eif5b	eukaryotic translation initiation factor 5B	1580.53	190.417	0.120476	-3.05318	0.00332366		Eif5b	MGI:2441772	Eif5b	eukaryotic translation initiation factor 5B	1158.28	185.23	0.159918	-2.64459	0.00183017
Mbnl2	MGI:2145597	Mbnl2	muscleblind-like 2	529.239	32.5713	0.0615436	-4.02225	0.00341931		Mbnl2	MGI:2145597	Mbnl2	muscleblind-like 2	368.04	31.6841	0.0860887	-3.53803	0.0026523
Tst	MGI:98852	Tst	thiosulfate sulfurtransferase, mitochondrial	507.687	30.0658	0.0592212	-4.07774	0.00346904		Tst	MGI:98852	Tst	thiosulfate sulfurtransferase, mitochondrial	531.75	29.2468	0.0550011	-4.1844	0.000139185
Cybb	MGI:88574	Cybb	cytochrome b-245, beta polypeptide	25239.4	4326.13	0.171404	-2.54453	0.00393645		Cybb	MGI:88574	Cybb	cytochrome b-245, beta polypeptide	15797.4	4208.29	0.266392	-1.90838	0.00601312
Ncoa4	MGI:1350932	Ncoa4	nuclear receptor coactivator 4	2725.22	404.218	0.148325	-2.75317	0.00436034		Ncoa4	MGI:1350932	Ncoa4	nuclear receptor coactivator 4	1616.17	393.207	0.243295	-2.03922	0.00943434
Orm1	MGI:97443	Orm1	orosomucoid 1	569.95	41.7581	0.0732662	-3.77071	0.00446253		Orm1	MGI:97443	Orm1	orosomucoid 1	601.911	40.6206	0.067486	-3.88927	0.000194541
Hspa4l	MGI:107422	Hspa4l	heat shock protein 4 like	231.093	4.17581	0.0180698	-5.79028	0.00479069		Hspa4l	MGI:107422	Hspa4l	heat shock protein 4 like	135.399	4.06206	0.0300006	-5.05886	0.00929461
Lims1	MGI:1195263; MGI:1917547	Lims1; Gcc2	LIM and senescent cell antigen-like domains 1; GRIP and coiled-coil domain containing 2	984.241	110.241	0.112006	-3.15835	0.00515237		Lims1	MGI:1195263; MGI:1917547	Lims1; Gcc2	LIM and senescent cell antigen-like domains 1; GRIP and coiled-coil domain containing 2	646.224	107.238	0.165946	-2.59121	0.00627723
Zeb2	MGI:1344407	Zeb2	zinc finger E-box binding homeobox 2	1500.31	207.955	0.138608	-2.85092	0.00595037		Zeb2	MGI:1344407	Zeb2	zinc finger E-box binding homeobox 2	1009.34	202.291	0.200419	-2.31891	0.00655529
Osbpl8	MGI:2443807	Osbpl8	oxysterol binding protein-like 8	1040.52	129.45	0.124409	-3.00684	0.00665719		Osbpl8	MGI:2443807	Osbpl8	oxysterol binding protein-like 8	749.62	125.924	0.167984	-2.57361	0.00497764
Itga4	MGI:96603	Itga4	integrin alpha 4	621.437	57.6261	0.0927304	-3.43081	0.00691765		Itga4	MGI:96603	Itga4	integrin alpha 4	411.121	56.0564	0.13635	-2.87461	0.0082836
Eif5	MGI:95309	Eif5	eukaryotic translation initiation factor 5	1875.09	295.647	0.157671	-2.66501	0.00759251		Eif5	MGI:95309	Eif5	eukaryotic translation initiation factor 5	1355.22	287.594	0.212211	-2.23643	0.00584573
Sec62	MGI:1916526	Sec62	SEC62 homolog (S. cerevisiae)	1252.45	175.384	0.140032	-2.83617	0.00767644		Sec62	MGI:1916526	Sec62	SEC62 homolog (S. cerevisiae)	845.63	170.607	0.201751	-2.30935	0.00872184
Csde1	MGI:92356	Csde1	cold shock domain containing E1, RNA binding	3005.41	536.173	0.178403	-2.48679	0.00861129		Csde1	MGI:92356	Csde1	cold shock domain containing E1, RNA binding	2214.39	521.569	0.235536	-2.08598	0.00616514

## Sheet: (D) Common up
Gene Name	MGI ID	Gene Symbol	Description	baseMean C	baseMean A2nd	foldChange	log2FoldChange	pval		Gene Name	MGI ID	Gene Symbol	Description	baseMean C	baseMean A25	foldChange	log2FoldChange	pval
Chil1	MGI:1340899	Chil1	chitinase-like 1	1.19737	974.633	813.975	9.66884	1.71896e-08		Chil1	MGI:1340899	Chil1	chitinase-like 1	2.4618	948.085	385.118	8.58916	3.75305e-11
Il1b	MGI:96543; MGI:96547	Il1b; Il1rn	interleukin 1 beta; interleukin 1 receptor antagonist	243.067	7057.95	29.0371	4.85982	1.34992e-06		Il1b	MGI:96543; MGI:96547	Il1b; Il1rn	interleukin 1 beta; interleukin 1 receptor antagonist	588.371	6865.69	11.669	3.54461	2.74472e-06
Cd79a	MGI:101774	Cd79a	CD79A antigen (immunoglobulin-associated alpha)	77.8293	2291.68	29.445	4.87995	7.92711e-06		Cd79a	MGI:101774	Cd79a	CD79A antigen (immunoglobulin-associated alpha)	86.1632	2229.26	25.8725	4.69335	6.20809e-08
Cma1	MGI:96941	Cma1	chymase 1, mast cell	144.882	3499.32	24.1529	4.59412	8.94257e-06		Cma1	MGI:96941	Cma1	chymase 1, mast cell	24.618	3404.01	138.273	7.11137	6.4752e-14
Mcpt4	MGI:96940	Mcpt4	mast cell protease 4	222.712	4703.63	21.1198	4.40053	1.17131e-05		Mcpt4	MGI:96940	Mcpt4	mast cell protease 4	25.8489	4575.51	177.009	7.46768	2.35732e-15
Il17a	MGI:107364; MGI:2676631	Il17a; Il17f	interleukin 17A; interleukin 17F	7.18424	518.635	72.1906	6.17374	0.000105334		Il17a	MGI:107364; MGI:2676631	Il17a; Il17f	interleukin 17A; interleukin 17F	0	504.508	Inf	Inf	6.38288e-09
Il17f	MGI:2676631	Il17f	interleukin 17F	3.59212	420.086	116.946	6.8697	0.000125093		Il17f	MGI:2676631	Il17f	interleukin 17F	0	408.643	Inf	Inf	7.89734e-08
Tpsb2	MGI:96942	Tpsb2	tryptase beta 2	419.081	5214.75	12.4433	3.6373	0.000157543		Tpsb2	MGI:96942	Tpsb2	tryptase beta 2	67.6996	5072.7	74.9295	6.22746	1.16596e-12
Plac8	MGI:2445289	Plac8	placenta-specific 8	146.08	2155.55	14.756	3.88323	0.000201628		Plac8	MGI:2445289	Plac8	placenta-specific 8	166.172	2096.84	12.6185	3.65747	9.62472e-06
Upp1	MGI:1097668	Upp1	uridine phosphorylase 1	108.961	1563.42	14.3484	3.84282	0.000403546		Upp1	MGI:1097668	Upp1	uridine phosphorylase 1	52.9288	1520.84	28.7336	4.84467	1.3866e-07
Cd79b	MGI:96431	Cd79b	CD79B antigen	69.4477	1163.38	16.7519	4.06625	0.000421786		Cd79b	MGI:96431	Cd79b	CD79B antigen	36.9271	1131.69	30.6466	4.93766	3.82294e-07
Scd1	MGI:98239	Scd1	stearoyl-Coenzyme A desaturase 1	58.6713	979.644	16.6972	4.06153	0.000650696		Scd1	MGI:98239	Scd1	stearoyl-Coenzyme A desaturase 1	173.557	952.959	5.49075	2.457	0.00471341
Ch25h	MGI:1333869	Ch25h	cholesterol 25-hydroxylase	149.672	1754.67	11.7235	3.55133	0.000744211		Ch25h	MGI:1333869	Ch25h	cholesterol 25-hydroxylase	12.309	1706.88	138.669	7.1155	6.47491e-12
Cd19	MGI:88319	Cd19	CD19 antigen	21.5527	567.074	26.311	4.7176	0.000841739		Cd19	MGI:88319	Cd19	CD19 antigen	25.8489	551.628	21.3404	4.41552	7.18963e-05
Fcmr	MGI:1916419	Fcmr	Fc fragment of IgM receptor	25.1449	585.448	23.283	4.54121	0.00104542		Fcmr	MGI:1916419	Fcmr	Fc fragment of IgM receptor	12.309	569.501	46.2669	5.53191	3.20138e-06
Spib	MGI:892986	Spib	Spi-B transcription factor (Spi-1/PU.1 related)	38.316	650.59	16.9796	4.08573	0.00181714		Spib	MGI:892986	Spib	Spi-B transcription factor (Spi-1/PU.1 related)	27.0799	632.869	23.3705	4.54662	2.59507e-05
Ccl4	MGI:98261	Ccl4	chemokine (C-C motif) ligand 4	342.449	2804.47	8.18946	3.03377	0.00188066		Ccl4	MGI:98261	Ccl4	chemokine (C-C motif) ligand 4	379.118	2728.08	7.19586	2.84717	0.000233192
Tph1	MGI:98796	Tph1	tryptophan hydroxylase 1	23.9475	511.119	21.3433	4.41571	0.00200326		Tph1	MGI:98796	Tph1	tryptophan hydroxylase 1	0	497.196	Inf	Inf	7.64522e-09
Dtx1	MGI:1352744; MGI:2672905	Dtx1; Dtx4	deltex 1, E3 ubiquitin ligase; deltex 4, E3 ubiquitin ligase	7.18424	313.185	43.5934	5.44604	0.00251843		Dtx1	MGI:1352744; MGI:2672905	Dtx1; Dtx4	deltex 1, E3 ubiquitin ligase; deltex 4, E3 ubiquitin ligase	13.5399	304.655	22.5005	4.49188	0.00090283
Lsp1	MGI:96832	Lsp1	lymphocyte specific 1	76.6319	888.611	11.5958	3.53554	0.00271875		Lsp1	MGI:96832	Lsp1	lymphocyte specific 1	163.71	864.406	5.28011	2.40057	0.00653836
Dmpk	MGI:94906	Dmpk	dystrophia myotonica-protein kinase	131.711	1261.09	9.57469	3.25923	0.0027415		Dmpk	MGI:94906	Dmpk	dystrophia myotonica-protein kinase	1.2309	1226.74	996.62	9.9609	2.39522e-13
Ppp1r16b	MGI:2151841	Ppp1r16b	protein phosphatase 1, regulatory (inhibitor) subunit 16B	0	173.713	Inf	Inf	0.00286629		Ppp1r16b	MGI:2151841	Ppp1r16b	protein phosphatase 1, regulatory (inhibitor) subunit 16B	6.15451	168.982	27.4566	4.77908	0.00653911
Pou2af1	MGI:105086	Pou2af1	POU domain, class 2, associating factor 1	11.9737	358.284	29.9225	4.90316	0.00304373		Pou2af1	MGI:105086	Pou2af1	POU domain, class 2, associating factor 1	17.2326	348.525	20.2247	4.33805	0.000677396
Il22	MGI:1355307; MGI:2151139	Il22; Iltifb	interleukin 22; interleukin 10-related T cell-derived inducible factor beta	0	162.021	Inf	Inf	0.00405431		Il22	MGI:1355307; MGI:2151139	Il22; Iltifb	interleukin 22; interleukin 10-related T cell-derived inducible factor beta	0	157.608	Inf	Inf	0.000460995
Tpsab1	MGI:96942; MGI:96943	Tpsb2; Tpsab1	tryptase beta 2; tryptase alpha/beta 1	518.463	3409.13	6.57545	2.71709	0.00412439		Tpsab1	MGI:96942; MGI:96943	Tpsb2; Tpsab1	tryptase beta 2; tryptase alpha/beta 1	54.1597	3316.27	61.2312	5.9362	2.67582e-11
Socs3	MGI:1201791	Socs3	suppressor of cytokine signaling 3	741.174	4609.25	6.21885	2.63665	0.00442427		Socs3	MGI:1201791	Socs3	suppressor of cytokine signaling 3	872.71	4483.7	5.13768	2.36112	0.00126408
Siglece	MGI:1932475	Siglece	sialic acid binding Ig-like lectin E	313.712	2188.96	6.9776	2.80273	0.00456617		Siglece	MGI:1932475	Siglece	sialic acid binding Ig-like lectin E	402.505	2129.33	5.2902	2.40332	0.00193802
Ccnd2	MGI:88314	Ccnd2	cyclin D2	65.8556	719.909	10.9316	3.45044	0.00502784		Ccnd2	MGI:88314	Ccnd2	cyclin D2	28.3108	700.299	24.7362	4.62855	1.23708e-05
Snn	MGI:1276549	Snn	stannin	116.145	1015.56	8.74384	3.12827	0.0053078		Snn	MGI:1276549	Snn	stannin	104.627	987.893	9.44207	3.2391	0.000335305
Ccl12	MGI:108224	Ccl12	chemokine (C-C motif) ligand 12	46.6976	586.283	12.5549	3.65018	0.00537679		Ccl12	MGI:108224	Ccl12	chemokine (C-C motif) ligand 12	25.8489	570.313	22.0633	4.46358	5.39928e-05
Mzb1	MGI:1917066	Mzb1	marginal zone B and B1 cell-specific protein 1	9.57899	293.977	30.6897	4.93968	0.00562878		Mzb1	MGI:1917066	Mzb1	marginal zone B and B1 cell-specific protein 1	8.61632	285.969	33.1892	5.05264	0.000463113
Egr3	MGI:1306780	Egr3	early growth response 3	8.38162	273.098	32.5829	5.02604	0.0065032		Egr3	MGI:1306780	Egr3	early growth response 3	0	265.659	Inf	Inf	7.00219e-06
Ptprcap	MGI:97811	Ptprcap	protein tyrosine phosphatase, receptor type, C polypeptide-associated protein	34.7238	484.393	13.9499	3.80218	0.00651179		Ptprcap	MGI:97811	Ptprcap	protein tyrosine phosphatase, receptor type, C polypeptide-associated protein	13.5399	471.199	34.8007	5.12104	2.75796e-05
Tnfrsf13c	MGI:1919299	Tnfrsf13c	tumor necrosis factor receptor superfamily, member 13c	9.57899	278.109	29.0332	4.85963	0.0073548		Tnfrsf13c	MGI:1919299	Tnfrsf13c	tumor necrosis factor receptor superfamily, member 13c	2.4618	270.533	109.892	6.77995	5.97844e-05
Nr4a1	MGI:1352454	Nr4a1	nuclear receptor subfamily 4, group A, member 1	21.5527	375.822	17.4373	4.12411	0.00767024		Nr4a1	MGI:1352454	Nr4a1	nuclear receptor subfamily 4, group A, member 1	29.5417	365.585	12.3753	3.62939	0.00240576
Cd2	MGI:88314; MGI:88320	Ccnd2; Cd2	cyclin D2; CD2 antigen	15.5659	315.691	20.281	4.34206	0.00927413		Cd2	MGI:88314; MGI:88320	Ccnd2; Cd2	cyclin D2; CD2 antigen	11.0781	307.092	27.7206	4.79288	0.000509138
Gimap3	MGI:1932723	Gimap3	GTPase, IMAP family member 3	11.9737	284.79	23.7845	4.57195	0.00945721		Gimap3	MGI:1932723	Gimap3	GTPase, IMAP family member 3	9.84722	277.033	28.1331	4.8142	0.000795391
Chst3	MGI:1858224	Chst3	carbohydrate (chondroitin 6/keratan) sulfotransferase 3	7.18424	237.186	33.0147	5.04504	0.00999579		Chst3	MGI:1858224	Chst3	carbohydrate (chondroitin 6/keratan) sulfotransferase 3	2.4618	230.725	93.7219	6.55031	0.000215229
