# Supplementary material for: RNA-Seq Revealed Expression of Many Novel Genes Associated With Leishmania donovani Persistence and Clearance in the Host Macrophage
Source: Front Cell Infect Microbiol. 2019 Feb 5;9:17. doi: 10.3389/fcimb.2019.00017 (PMC6370631; doi:10.3389/fcimb.2019.00017)
Supplement: Supplementary Data Sheet 4 — Pathways, molecular functions and cellular functions of important protein network nodes modulated by each of the parasites. List of Hub and Bottleneck, Bottleneck constructed from Virulent and Non-virulent L. donovani infected macrophage genes with their involvement in different pathways, having specific molecular functions and their impact on cellular function including pathogenesis. [file Data_Sheet_4.xlsx]

## Sheet: Virulent-Down
S.NO	Gene symbol	Gene name	Network importance	Pathway involvements	Molecular functions	Impact on pathogenesis
1	Abca1	ATP-binding cassette sub-family A member 1	Hub & Bottleneck	ABC-transporters, Fat-digestion-and-absorption	ATP binding, Catalytic activity, Transporter activity	Abca1 contributes to macrophage export of cholesterol into the extracellular matrix. PMID: 26203076. Down-regulation of the genes plays an important role in oxysterol generation by encoding both the ATP-binding cassette transporter A1 (ABCA1) and the sterol 27-hydroxylase. ABCA 1 mediates the active efflux of cellular cholesterol and phospholipids, (CYP27) involved in the prevention of cholestero…
2	Actr2	Actin-related protein 2	Hub & Bottleneck	Alzheimer disease-presenilin pathway, Cadherin signaling pathway, Huntington disease	ATP binding, Structural constituent of cytoskeleton	Arp2/3 in three-dimensional cell migration, allowing fast-moving cells such as leukocytes to rapidly and efficiently migrate through narrow gaps, a process probably important for their function. PMID: 26975831
3	Adam10	Disintegrin and metalloproteinase domain-containing protein 10	Hub & Bottleneck	Alzheimer's-disease	Catalytic activity, Protein binding	Adam10-deficient macrophages displayed increased in anti-inflammatory phenotype with elevated IL-10, and reduced production of pro-inflammatory tumor necrosis factor, IL-12, and nitric oxide in response to lipopolysaccharide. These data suggest a critical role of Adam10 for leukocyte recruitment, inflammatory mediator production, and extracellular matrix degradation PMID: 25659879
						Involved in proteolytic release of several other cell-surface proteins.
4	Atp6v0d2	V-type proton ATPase subunit d 2	Hub & Bottleneck	Phagosome, Lysosome, Collecting-duct-acid-secretion, Synaptic-vesicle-cycle, Viral-carcinogenesis, Rheumatoid-arthritis, Tuberculosis	Catalytic activity, Transporter activity	V-ATPase (Atp6v0d2) plays an important role in phagosome acidification. Maturing phagosomes sequentially interact with various endocytic organelles to acquire hydrolases such as cathepsins and V-ATPase PMID: 12061891
5	Eif2ak2	Interferon-induced, double-stranded RNA-activated protein kinase	Bottleneck	Protein-processing-in-endoplasmic-reticulum, Viral-carcinogenesis, Measles, Influenza-A, Hepatitis-C, Herpes-simplex-infection, Epstein-Barr-virus-infection	ATP binding, Catalytic activity,	Association between PKR and TRBP integrates metabolism with translational control and inflammatory signaling and plays important roles in metabolic homeostasis and disease. PMID: 25843719. Double-stranded RNA binding protein which upon binding induced interferon production. With leishmanial infection it regulate replication of other pathogenic infection in latently infected cells through distinct…
6	Eif3a	Eukaryotic translation initiation factor 3 subunit A	Hub & Bottleneck	RNA-transport	Translation regulator activity	eIF3a appears to play an important role in cellular responses to external cell cycle modulators likely by affecting synthesis of target proteins of these modulators.PMID: 19327350
						The eIF-3 complex specifically targets and initiates translation of a subset of mRNAs involved in cell proliferation.
7	F13a1	Coagulation factor XIII A chain	Hub & Bottleneck	Complement-and-coagulation-cascades	Catalytic activity, Metal binding protein	cFXIII is involved in the mechanism of phagocytosis by monocytes and macrophages. PMID: 15219459
						It is involved in transglutaminase activity. M2 macrophages probably contribute to the excessive fibrin deposition in the submucosa, which further contribute to the tissue remodeling and pathogenesis.
8	Lrrk2	Leucine-rich repeat serine/threonine-protein kinase 2	Hub & Bottleneck	Parkinson's-disease	ATP binding, Catalytic activity	LRRK2 is an IFN-γ target gene able to activate signaling pathways involved in immune responses in response to pathogens. This study clearly indicates that LRRK2 is involved in immune response. PMID: 20921534. It is involved in in the innate immune system which plays a role in the killing of intracellular pathogen
9	Prkcb	Protein kinase C beta type	Hub & Bottleneck	Ras-signaling-pathway, Rap1-signaling-pathway, MAPK-signaling-pathway, ErbB-signaling-pathway, Wnt-signaling-pathway, VEGF-signaling-pathway, NF-kappa-B-signaling-pathway, HIF-1-signaling-pathway, Calcium-signaling-pathway, Phosphatidylinositol-signaling-system, Sphingolipid-signaling-pathway, mTOR-signaling-pathway, Focal-adhesion, Tight-junction, Gap-junction, Natural-killer-cell-mediated-cytot…	ATP binding, Catalytic activity	Suppression of macrophage-mediated phagocytosis of apoptotic cells by soluble β-glucan is due to a failure of PKC-βII translocation. PMID: 26745713. It is involved in B cell activation, apoptosis induction, endothelial cell proliferation, and intestinal sugar absorption.
10	Psme4	Proteasome activator complex subunit 4	Hub & Bottleneck	Proteasome	Peptidase activator activity	Used as a clearance marker in parasitic infection therapy. PMID: 26214306
11	Skil	Ski-like protein	Bottleneck	Signaling-pathways-regulating-pluripotency-of-stem-cells	Repressing transcription factor binding	Skil which is a negative regulator of Tgf-β signaling PMID: 22992590. It is involved in transcriptional repressor activity
12	Sp3	Transcription factor Sp3	Bottleneck	CCKR signaling map, B cell differentiation	DNA binding	These data suggested that inhibition of FGF-10 by inflammatory signaling involves the NF-κB-dependent interactions between RELA, SP3, and the Fgf-10 promoter. PMCID: PMC3663551. It is involved in regulation of the transcriptional activity of Sp1
13	Tgfbr1	TGF-beta receptor type-1	Hub & Bottleneck	MAPK-signaling-pathway, TGF-beta-signaling-pathway, Hippo-signaling-pathway, FoxO-signaling-pathway, Cytokine-cytokine-receptor-interaction, Endocytosis, Adherens-junction, Osteoclast-differentiation, Pathways-in-cancer, Colorectal-cancer, Pancreatic-cancer, Chronic-myeloid-leukemia, AGE-RAGE-signaling-pathway-in-diabetic-complications, HTLV-I-infection, Hepatitis-B, Chagas-disease.	ATP binding, Receptor activity	Role of transforming growth factor-β superfamily signaling pathways in human disease PMID: 18313409. It is identified as a wound healing genes
14	Tlr7	Toll-like receptor 7	Hub & Bottleneck	Toll-like-receptor-signaling-pathway, Measles, Influenza-A	RNA binding, Receptor activity	Toll-like receptor 7 stimulation by imiquimod induces macrophage autophagy and inflammation in atherosclerotic plaques. PMID: 22543675. It is involved in recognizing double-stranded RNA which upon triggers NF-κB and initiate the production of IFN-γ
15	Trip12	E3 ubiquitin-protein ligase TRIP12	Hub & Bottleneck	Ubiquitin-mediated-proteolysis	Receptor activity	The HECT domain of TRIP12 ubiquitinates substrates of the ubiquitin fusion degradation pathway. PMID: 19028681. It plays an important role as a regulator of DNA damage and involved in guarding against excessive spreading of ubiquitinated chromatin at damaged chromosomes.
16	Vps35	Vacuolar protein sorting-associated protein 35	Bottleneck	Endocytosis	Transporter activity	Vps35 is known to be involved in retrograde transport of proteins from endosomes to the trans-Golgi network {Bonifacino, 2008 #38}. It involved in regulating mitochondrial functions which protects dopaminergic cells against the mitochondrial toxin MPP+

## Sheet: Virulent-Up
S.NO	Gene symbol	Gene name	Network importance	Pathway involvements	Molecular functions	Impact on pathogenesis
1	Ccl22	C-C motif chemokine 22	Bottleneck	Cytokine-cytokine-receptor-interaction, Chemokine-signaling-pathway	Catalytic activity, CCR chemokine receptor binding	The chemokine system in diverse forms of macrophage activation and polarization. PMID: 15530839. It plays an important role in the collaboration of dendritic cells and B-lymphocytes with T-cells in immune responses.

## Sheet: Non-virulent-Down
S.NO	Gene symbol	Gene name	Network importance	Pathway involvements	Molecular functions	Impact on pathogenesis
1	Aph1c	Anterior pharynx defective 1b putative splice variant	Hub & Bottleneck	Notch-signaling-pathway, Alzheimer's-disease	Endopeptidase activity	The multimolecular complex γ-secretase cleaves proteins in their transmembrane domain. The complex consists of at least four subunits called Presenilin (Psen), Nicastrin (Nct), Pen2, and Aph1 PMID: 15665098. Its involved in transcription factor activity
2	Cadm1	Cell adhesion molecule 1	Bottleneck	Cell-adhesion-molecules	Receptor activity	CADM1 controls actin cytoskeleton assembly and regulates extracellular matrix adhesion in human mast cells. PMID: 24465823. It involved in recognizing damaged cells and regulated the autophagic digestion of Leishmania parasite by host macrophages
3	Cd9	CD9 antigen	Bottleneck	Hematopoietic-cell-lineage	NA	Tetraspanin CD9 negatively regulates lipopolysaccharide-induced macrophage activation and lung inflammation. PMID: 19414803. It is involved in alterations in exosome surface which play an important role in exosome targeting
4	Cdkn1c	Cyclin-dependent kinase inhibitor 1C	Hub & Bottleneck	Cell-cycle	Catalytic activity	Proapoptotic proteins BCL2L11 and CDKN1C as miR-221 targets suggesting that IFN-α can induce DC apoptosis via miR-221 downregulation. PMID: 26090579. It is involved in immune system process
5	Ctsk	Cathepsin K	Bottleneck	Lysosome, Apoptosis, Toll-like-receptor-signaling-pathway, Osteoclast-differentiation, Rheumatoid-arthritis	Catalytic activity	Cathepsin K inhibition renders equine bone marrow nucleated cells hypo-responsive to LPS and unmethylated CpG stimulation in vitro. PMID: 27012920. It is involved in regradation of defective mitochondria
6	Cyp1b1	Cytochrome P450 1B1	Hub & Bottleneck	Steroid-hormone-biosynthesis, Tryptophan-metabolism, Metabolism-of-xenobiotics-by-cytochrome-P451, Ovarian-Steroidogenesis, MicroRNAs-in-cancer, Chemical-carcinogenesis	Catalytic activity	Upregulation of CYP1B1 expression by inflammatory cytokines is mediated by the p38 MAP kinase signal transduction pathway. PMID: 25233930. It is invplved in regulation of cell adhesion mediated by integrin
7	Galnt7	N-acetylgalactosaminyltransferase 7	Hub & Bottleneck	Mucin-type-O-glycan-biosynthesis	Catalytic activity	Elevated GALNT7 expression contributes to growth and invasiveness of cervical cancer cells. PMID: 22399294
8	Gstm1	Glutathione S-transferase Mu 1	Hub	Glutathione-metabolism, Metabolism-of-xenobiotics-by-cytochrome-P455, Drug-metabolism-cytochrome-P462, Chemical-carcinogenesis, Platinum-drug-resistance	Transferase activity	Glutathione S-transferase P1 suppresses iNOS protein stability in RAW264.7 macrophage-like cells after LPS stimulation. PMID: 26361746. It is involved in regulating the PTEN mRNA, which play an im[ortant role in repair and recovery
9	Gstm2	Glutathione S-transferase Mu 2	Hub & Bottleneck	Glutathione-metabolism, Metabolism-of-xenobiotics-by-cytochrome-P456, Drug-metabolism-cytochrome-P463, Chemical-carcinogenesis, Platinum-drug-resistance	Transferase activity	Glutathione S-transferase Mu 2-transduced mesenchymal stem cells ameliorated anti-glomerular basement membrane antibody-induced glomerulonephritis by inhibiting oxidation and inflammation. PMID: 24480247. It is found to be an essential enzyme for parasite, which is involved in parasite-specific trypanothione metabolism
10	Ppp1cb	Serine/threonine-protein phosphatase PP1-beta catalytic subunit	Hub & Bottleneck	mRNA-surveillance-pathway, Hippo-signaling-pathway, cAMP-signaling-pathway, cGMP-PKG-signaling-pathway, Regulation-of-actin-cytoskeleton, Oocyte-meiosis, Focal-adhesion, Platelet-activation, Insulin-signaling-pathway, Oxytocin-signaling-pathway, Adrenergic-signaling-in-cardiomyocytes, Vascular-smooth-muscle-contraction, Dopaminergic-synapse, Long-term-potentiation, Inflammatory-mediator-regulatio…	Metal ion binding, Catalytic activity	Protein Phosphatase 1 Beta is Modulated by Chronic Hypoxia and Involved in the Angiogenic Endothelial Cell Migration. PMID: 25967976. Ppp1cb interacts with AKT1, where PP-1 acts as a major phosphatase to dephosphorylate AKT to modulate its functions.
11	Spp1	Osteopontin	Hub & Bottleneck	PI3K-Akt-signaling-pathway, ECM-receptor-interaction, Focal-adhesion, Toll-like-receptor-signaling-pathway	Cytokine activity	Osteopontin That Is Elevated in the Airways during COPD Impairs the Antibacterial Activity of Common Innate Antibiotics. PMID: 26731746 Osteopontin affects macrophage polarization promoting endocytic but not inflammatory properties. PMID: 27221527
12	Vwf	von Willebrand factor	Hub & Bottleneck	PI3K-Akt-signaling-pathway, ECM-receptor-interaction, Focal-adhesion, Complement-and-coagulation-cascades, Platelet-activation	Endopeptidase activity, Ion binding	Macrophages contribute to the cellular uptake of von Willebrand factor and factor VIII in vivo. PMID: 18559674. Disseminated intravascular coagulation occurs in human and canine visceral leishmaniasis which is associated with several immunological and pathological mechanisms

## Sheet: Non-virulent-Up
S.NO	Gene symbol	Gene name	Network importance	Pathway involvements	Molecular functions	Impact on pathogenesis
1	Adora2b	Adenosine receptor A2b	Hub & Bottleneck	Rap1-signaling-pathway, Calcium-signaling-pathway, Neuroactive-ligand-receptor-interaction, Vascular-smooth-muscle-contraction, Alcoholism	Receptor activity	Furthermore, adenosine treatment at the time of L. braziliensis inoculation delays lesion resolution and induces increased parasite burdens. Consistent with this, inhibition of adenosine receptor A2B led to decreased lesion size and lower parasite burden (Dwyer and Gottlieb, 1984). Adenosine, an endogenous purine nucleoside receptor involved in extracellular signaling is involved in regulating th…
2	C1qa	Complement C1q subcomponent subunit A	Hub & Bottleneck	Complement-and-coagulation-cascades, Systemic-lupus-erythematosus, Prion-diseases, Pertussis, Staphylococcus-aureus-infection, Chagas-disease	Innate immune response	Beta-arrestin 2 is required for complement C1q expression in macrophages and constrains factor-independent survival. PMID: 19783052. Gene upregulation is essential due to for immune pathogenicity
3	Card11	Caspase recruitment domain-containing protein 11	Hub & Bottleneck	NF-kappa-B-signaling-pathway, T-cell-receptor-signaling-pathway, B-cell-receptor-signaling-pathway	CARD domain binding	CARMA1 (also known as CARD11 or Bimp3) is selectively expressed in lymphocytes and associates constitutively with lipid rafts (Gaide et al 2002). It promotes BCR signaling where BCR and TLR signals takes part in promoting the survival of a subset of refractory B cell lymphomas
4	Ccl2	C-C motif chemokine 2	Hub & Bottleneck	TNF-signaling-pathway, Cytokine-cytokine-receptor-interaction, NOD-like-receptor-signaling-pathway, Chemokine-signaling-pathway, Rheumatoid-arthritis, AGE-RAGE-signaling-pathway-in-diabetic-complications, Influenza-A, Herpes-simplex-infection, Malaria, Chagas-disease.	CCR2 chemokine receptor binding, Catalytic activity	Ccl2 and Ccl3 increases the leishmanicidal ability of human macrophages to the same level induced by IFN-γ (Brandonisio et al., 2002). It modulates leucocyte migration and involved in T-cell differentiation which provides immune responses against parasitic infection.
5	Ccl3	C-C motif chemokine 3	Bottleneck	Cytokine-cytokine-receptor-interaction, Toll-like-receptor-signaling-pathway, Chemokine-signaling-pathway, Rheumatoid-arthritis, Salmonella-infection, Chagas-disease	CCR2 chemokine receptor binding, Catalytic activity	Ccl2 and Ccl3 increases the leishmanicidal ability of human macrophages to the same level induced by IFN-γ (Brandonisio et al., 2002).
						Neutrophil-secreted CCL3 regulate the development of immune response against pathogens.
6	Ccl6	C-C motif chemokine 6	Hub & Bottleneck	Cytokine-cytokine-receptor-interaction, Chemokine-signaling-pathway	CCR2 chemokine receptor binding, Catalytic activity	CCL6 may have intrinsic antibacterial properties (46), and overexpression of CCL6 in transgenic mice confers protection against bacterial sepsis (47). PMCID: PMC4496617. Chemokines is an integral part of the host defense against pathogens. It is involved in leukocyte trafficking, pathogen clearance
7	Cd81	CD81 antigen	Bottleneck	B cell receptor signaling pathway, Malaria, Hepatitis C.	Transferrin receptor binding	CD81 potentially plays a role in macrophage cell line growth regulation. PMCID: PMC3595608
8	Cdkn1a	Cyclin-dependent kinase inhibitor 1	Hub & Bottleneck	ErbB-signaling-pathway, Jak-STAT-signaling-pathway, HIF-1-signaling-pathway, FoxO-signaling-pathway, PI3K-Akt-signaling-pathway, Cell-cycle, p53-signaling-pathway, Oxytocin-signaling-pathway, Pathways-in-cancer, Transcriptional-misregulation-in-cancers, MicroRNAs-in-cancer, Proteoglycans-in-cancer, Viral-carcinogenesis, Glioma, Chronic-myeloid-leukemia, Melanoma, Bladder-cancer, Prostate-cancer, …	Cyclin binding, Catalytic activity	p21 is a central regulator of innate and adaptive immunity. PMCID: PMC4966310. It is involved in cell differentiation which involved in immune response.
9	Cfp	Cyclin-Y	Bottleneck	Herpes-simplex-infection	Kinase regulator activity	Properdin: New roles in pattern recognition and target clearance PMCID: PMC2628304. It contain antigens which are highly immunogenic and provide protections from other lethal parasites.
10	Cish	Suppressor of cytokine signaling 1	Bottleneck	Jak-STAT signaling pathway, Prolactin signaling pathway	Kinase inhibitor activity, Catalytic activity	Once expressed, CIS/JAB/SOCS/SSI proteins interfere with signaling events and suppress cytokine-specific cellular responses. Aman, M. J., and Leonard, W. J. (1997) Curr. Biol. 12, R784–R788
11	Cpa3	Mast cell carboxypeptidase A	Bottleneck	Renin-angiotensin system, Pancreatic secretion, Protein digestion and absorption	Catalytic activity, Ion binding	An inflammatory role for the mammalian carboxypeptidase inhibitor latexin: relationship to cystatins and the tumor suppressor TIG1. PMID: 15698574
12	Cxcl9	C-X-C motif chemokine 9	Hub & Bottleneck	Cytokine-cytokine-receptor-interaction, Toll-like-receptor-signaling-pathway, Chemokine-signaling-pathway	Receptor binding, CXCR3 chemokine receptor binding	The chemokines CXCL9 (Monokine Induced by IFN-γ, MIG) and CXCL10 (IFN-γ Inducible Protein 10, IP-10) are critical in both innate and adaptive immune responses to Leishmania infection (Steve et al., 2010). It is involved in both innate and adaptive immune responses to Leishmania infection, which with IFN-γ play an important immunopathogenic role in the disease.
13	Cxcr5	C-X-C chemokine receptor type 5	Hub & Bottleneck	Cytokine-cytokine-receptor-interaction, Chemokine-signaling-pathway	C-X-C chemokine receptor activity,	It involves in expressing DCs and T cells which are important for development of interleukin 4
14	Cyp11a1	Cholesterol side-chain cleavage enzyme, mitochondrial	Bottleneck	Steroid hormone biosynthesis, Ovarian steroidogenesis, Aldosterone synthesis and secretion	Catalytic activity, Ion binding	The mitochondrial cholesterol side-chain cleavage enzyme P450scc, encoded by CYP11A1, is the first and rate-limiting step in production of all steroid hormones (figure 4); designation of a cell as being ‘steroidogenic’ requires that CYP11A1 is expressed. PMCID: PMC3538421
15	Dab2	Disabled homolog 2	Bottleneck	Endocytosis	Ceceptor activity, Integrin binding	(Dab2) (21) as a gene that is differentially regulated in M1 and M2 macrophages. PMCID: PMC4811113 Dab2 mediates the signal transduction of colony stimulating factor 1 (CSF-1) in macrophages33,34. PMCID: PMC5066213
16	Dbp	Peroxisomal multifunctional enzyme type 2	Bottleneck	Vitamin D metabolism and pathway	DNA/RNA binding	Vitamin D binding protein (DBP) functions as a chemotactic cofactor for C5a and C5a des Arg, significantly augmenting cell migration to suboptimal concentrations of these C5-derived peptides. PMCID: PMC3702662
17	Edn1	Endothelin-1	Hub & Bottleneck	AGE-RAGE-signaling-pathway-in-diabetic-complications	Receptor binding	Endothelin 1 (Edn1) has been described as a proinflammatory cytokine. PMID: 12663451
18	Egr1	Early growth response protein 1	Hub & Bottleneck	Prion-diseases, AGE-RAGE-signaling-pathway-in-diabetic-complications, HTLV-I-infection	DNA binding,	EGR1 has been associated with acute inflammatory and regenerative responses. PMCID: PMC4791893. It involved in activation of caspases, and it increase the apoptosis process of infected macrophages.
19	Ets1	Protein C-ets-1	Hub & Bottleneck	Ras-signaling-pathway, Dorso-ventral-axis-formation, Renal-cell-carcinoma, HTLV-I-infection	DNA binding,	Ets1 is a transcription factor. Which controls the expression of cytokine and chemokine genes.
20	F3	Tissue factor	Bottleneck	Complement and coagulation cascades, AGE-RAGE signaling pathway in diabetic complications	Phospholipid binding, Receptor activity, Signal transducer activity	LPS stimulation of monocytes and monocytic cells induces TF expression in vitro and in vivo.5,14–17 PMCID: PMC2918334
21	Fcer1a	High affinity immunoglobulin epsilon receptor subunit alpha	Bottleneck	Phospholipase-D-signaling-pathway, Sphingolipid-signaling-pathway, Fc-epsilon-RI-signaling-pathway, Asthma	Receptor activity	Transcriptomic Profiling of the Development of the Inflammatory Response in Human Monocytes In Vitro. PMCID: PMC3912012. It is involved in initiating the allergic response and also involved in secretion of important lymphokines
22	Fn1	Fibronectin	Hub & Bottleneck	PI3K-Akt-signaling-pathway, ECM-receptor-interaction, Regulation-of-actin-cytoskeleton, Focal-adhesion, Pathways-in-cancer, Proteoglycans-in-cancer, Small-cell-lung-cancer, AGE-RAGE-signaling-pathway-in-diabetic-complications, Bacterial-invasion-of-epithelial-cells, Amoebiasis.	Protease binding, Activator activity	Novel Markers to Delineate Murine M1 and M2 Macrophages. PMID: 26699615. It regulates the intraphagosomal replication of parasites inside the macrophage.
23	Fzd1	Frizzled-1	Hub & Bottleneck	Wnt-signaling-pathway, Hippo-signaling-pathway, mTOR-signaling-pathway, Signaling-pathways-regulating-pluripotency-of-stem-cells, Melanogenesis, Pathways-in-cancer, Proteoglycans-in-cancer, Basal-cell-carcinoma, HTLV-I-infection.	Wnt-protein binding, Receptor activity, Signal transducer activity	Frizzled1 is a marker of inflammatory macrophages, and its ligand Wnt3a is involved in reprogramming Mycobacterium tuberculosis-infected macrophages. PMID: 20667980. It is involved in regulating Toll-like receptor (TLR)/nuclear factor-κB (NF-κB) and the Wnt/β- pathway after infection.
24	Gata2	Endothelial transcription factor GATA-2	Hub & Bottleneck	Gonadotropin-releasing hormone receptor pathway	DNA binding	GATA-2 Transduces LPS-Induced il-1β Gene Expression in Macrophages via a Toll-Like Receptor 4/MD88/MAPK-Dependent Mechanism. PMID: 23940812. A transcriptional factor involved in erythropoiesis.
25	Gzmb	Granzyme B(G,H)	Bottleneck	Allograft-rejection, Graft-versus-host-disease, Type-I-diabetes-mellitus	Catalytic activity	Deficiency in gzmA and gzmB does neither influence the course of disease caused by L. major nor result in an altered cytokine response pattern (Eiser et al. 2002).
26	Hbegf	Proheparin-binding EGF-like growth factor	Hub & Bottleneck	ErbB-signaling-pathway, GnRH-signaling-pathway, Estrogen-signaling-pathway, Proteoglycans-in-cancer, Bladder-cancer, Endocrine-resistance	Heparin binding	The Expression of Heparin-Binding Epidermal Growth Factor-Like Growth Factor by Regulatory Macrophages. PMCID: PMC2872542. Sp1 is involved in HB-EGF production which regulates macrophages
27	Hdc	Histidine decarboxylase	Bottleneck	Histidine-metabolism	Catalytic activity	Induction of histidine decarboxylase in macrophages inhibited by the novel NF-kappaB inhibitor (-)-DHMEQ. PMID: 19103154
28	Il2ra	Interleukin-2 receptor subunit alpha	Bottleneck	Jak-STAT-signaling-pathway, PI3K-Akt-signaling-pathway, Cytokine-cytokine-receptor-interaction, Endocytosis, Hematopoietic-cell-lineage, HTLV-I-infection, Measles.	Drug binding, Receptor activity, Signal transducer activity	The M1 and M2 paradigm of macrophage activation: time for reassessment.
						IL2RA are associated with greater susceptibility to lesion development and it is involved in primary and memory immune responses.
29	Itgal	Integrin alpha-L	Bottleneck	Rap1-signaling-pathway, Cell-adhesion-molecules, Regulation-of-actin-cytoskeleton, Natural-killer-cell-mediated-cytotoxicity, Leukocyte-transendothelial-migration, Rheumatoid-arthritis, Viral-myocarditis, Staphylococcus-aureus-infection, HTLV-I-infection, Epstein-Barr-virus-infection, Malaria.	Receptor activity, Metal ion binding	Integrated Transcriptomics Establish Macrophage Polarization Signatures and have Potential Applications for Clinical Health and Disease. PMID: 26302899
30	Kit	Mast/stem cell growth factor receptor Kit	Hub & Bottleneck	Ras-signaling-pathway, Rap1-signaling-pathway, Phospholipase-D-signaling-pathway, PI3K-Akt-signaling-pathway, Cytokine-cytokine-receptor-interaction, Endocytosis, Hematopoietic-cell-lineage, Melanogenesis, Pathways-in-cancer, Central-carbon-metabolism-in-cancer, Acute-myeloid-leukemia.	ATP binding, Cytokine binding, Metal ion binding	KIT oncogene inhibition drives intratumoral macrophage M2 polarization. PMCID: PMC3865475. It activates genes of STAT family and further leads to the production of the cellular signaling molecules diacylglycerol and inositol 1,4,5-trisphosphate.
31	Lck	Proto-oncogene tyrosine-protein kinase LCK	Hub & Bottleneck	NF-kappa-B-signaling-pathway, Natural-killer-cell-mediated-cytotoxicity, T-cell-receptor-signaling-pathway, Osteoclast-differentiation, Primary-immunodeficiency, HTLV-I-infection.	ATP binding, CD4 &CD8 receptor binding, Catalytic activity	The Productive Entry Pathway of HIV-1 in Macrophages Is Dependent on Endocytosis through Lipid Rafts Containing CD4. PMID: 24465876. Involved in delayed type hypersensitivity responses, interferon-γ production.
32	Lfng	Beta-1,3-N-acetylglucosaminyltransferase lunatic fringe	Bottleneck	Other-types-of-O-glycan-biosynthesis, Notch-signaling-pathway	Metal ion binding, Catalytic activit	Monsalve et al. showed in murine macrophage the expression of these three genes including Lfng is involved in Notch processing. They further showed that the expression of these genes was however not altered in macrophages activated by proinflammatory signals (Monsalve et al 2006). Lfgn inhibits Notch signaling which results in inhibition of T-cell commitment and promotes B-cell development in lym…
33	Nlrp3	NACHT, LRR and PYD domains-containing protein 3	Bottleneck	NOD-like-receptor-signaling-pathway, Pertussis, Influenza-A	ATP binding, DNA binding	Inflammasome-derived IL-1β production induces nitric oxide-mediated resistance to Leishmania. PMID: 23749230. It is an inflammasome complex is assembled in response to pathogens involved in generating the proinflammatory cytokines interleukin 1 (IL-1) and IL-18
34	Nup210	Nuclear pore membrane glycoprotein 210	Hub & Bottleneck	RNA-transport	Transporter activity	Nuclear pore membrane glycoprotein
35	Osm	Oncostatin-M	Bottleneck	Jak-STAT-signaling-pathway, PI3K-Akt-signaling-pathway, Cytokine-cytokine-receptor-interaction	Receptor binding	Oncostatin m, an inflammatory cytokine produced by macrophages, supports intramembranous bone healing in a mouse model of tibia injury. PMID: 25559270. It plays an important role in the formation and/or maintenance of functional intercellular barriers.
36	Pax5	Paired box protein Pax-5	Hub & Bottleneck	Transcriptional-misregulation-in-cancers	DNA binding	May play an important role in B-cell differentiation as well as neural development and spermatogenesis. Involved in the regulation of the CD19 gene, a B-lymphoid-specific target gene.
37	Rhobtb1	Rho-related BTB domain-containing protein 1	Hub	Ubiquitin-mediated-proteolysis	GTP binding, Catalytic activity	The protein plays a role in small GTPase-mediated signal transduction and the organization of the actin filament system. Alternate splicing results in multiple transcript variants
38	Socs1	Suppressor of cytokine signaling 1	Hub & Bottleneck	Ubiquitin-mediated-proteolysis, Jak-STAT-signaling-pathway, Insulin-signaling-pathway, Prolactin-signaling-pathway, Osteoclast-differentiation, MicroRNAs-in-cancer, Type-II-diabetes-mellitus, Toxoplasmosis.	Inhibitor activity	Suppressor of cytokine signaling (SOCS)1 is a key determinant of differential macrophage activation and function. PMID: 21628332. SOCS1 plays an important role in the regulation of appropriate inflammatory responses during the resolution of L. major infection
39	Timp1	Metalloproteinase inhibitor 1	Hub & Bottleneck	HIF-1-signaling-pathway	Protease binding, Catalytic activity	Identification of TIMP-2 in human alveolar macrophages. Regulation of biosynthesis is opposite to that of metalloproteinases and TIMP-1. PMID: 1629188. Increase in TIMP1 level in PKDL raises the possibility of its counteracting activity on MMP-9, as it is known to be a major inhibitor of MMP-9
40	Trf	Telomeric repeat-binding factor	Hub & Bottleneck	HIF-1-signaling-pathway, Mineral-absorption	DNA binding	Transferrin-derived synthetic peptide induces highly conserved pro-inflammatory responses of macrophages. PMID: 18952294. TRF1 and TRF2 proteins,, bind double-stranded telomeres via a Myb-like DNA-binding domain and are involved with telomere length regulation and chromosome end protection. In addition, TRF2 can modulate the activity of several enzymes and influence the conformation of telomeric …
41	Wnt1	Proto-oncogene Wnt-1	Hub & Bottleneck	Wnt-signaling-pathway, Hippo-signaling-pathway, mTOR-signaling-pathway, Signaling-pathways-regulating-pluripotency-of-stem-cells, Melanogenesis, Pathways-in-cancer, Proteoglycans-in-cancer, Basal-cell-carcinoma, HTLV-I-infection.	Cytokine activity, Receptor binding	Wnt1 Participates in Inflammation Induced by Lipopolysaccharide Through Upregulating Scavenger Receptor A and NF-kB. PMCID: PMC4495710. Wnt1 and SFRP1 play important roles in the development cutaneous squamous cell carcinoma
